# Supplementary material for: Relugolix for oral treatment of uterine leiomyomas: a dose-finding, randomized, controlled trial
Source: PubMed Central journal article supplement (PMC8555132; doi:10.1186/s12905-021-01475-2), 2021-10-28

## Supplementary Materials

**Table S1** Study assessments

|                                           | Pretreatment |                             | Treatment |        |        |        |         | Follow-up<br>(4 wks) |
|-------------------------------------------|--------------|-----------------------------|-----------|--------|--------|--------|---------|----------------------|
|                                           | Screening    | Placebo run-in<br>(3–6 wks) | Day 1     | Week 2 | Week 4 | Week 8 | Week 12 |                      |
| Visit                                     | 1            | 2                           | 3         | 4      | 5      | 6      | 7       | 8                    |
| Demography,<br>baseline characteristics   | X            |                             |           |        |        |        |         |                      |
| Patient diary (PBAC<br>and NRS)           | ←—————→      |                             |           |        |        |        |         |                      |
| Transvaginal<br>ultrasound scan           | X            |                             | X         | X      | X      | X      | X       |                      |
| Hemoglobin                                | X            | X                           | X         |        | X      | X      | X       | X                    |
| UFS-QOL                                   |              |                             | X         |        | X      | X      | X       |                      |
| Pharmacodynamic<br>measures <sup>a</sup>  |              |                             | X         | X      | X      | X      | X       | X                    |
| Menstruation recovery                     |              |                             |           |        |        |        |         | X                    |
| AEs                                       | X            | X                           | X         | X      | X      | X      | X       | X                    |
| Vital signs, weight                       | X            | X                           | X         |        | X      | X      | X       | X                    |
| Physical examination                      | X            | X                           | X         | X      | X      | X      | X       | X                    |
| Clinical laboratory<br>tests <sup>b</sup> | X            | X                           | X         |        | X      | X      | X       | X                    |
| 12-lead ECG                               | X            |                             | X         |        | X      | X      | X       | X                    |
| BMD                                       |              | X                           |           |        |        |        | X       |                      |
| Pregnancy test <sup>c</sup>               | X            |                             |           |        | X      | X      | X       | X                    |
| Concomitant<br>medications                | X            | X                           | X         | X      | X      | X      | X       | X                    |

*Abbreviations:* AE adverse event, BMD bone mineral density, ECG electrocardiogram, NRS numerical rating scale, PBAC pictorial blood loss assessment chart, UFS-QOL Uterine Fibroid Symptom Health-Related Quality of Life Questionnaire

<sup>a</sup>Blood estradiol, luteinizing hormone, follicle-stimulating hormone, progesterone

<sup>b</sup>Serum chemistry, hematology, and urinalysis

<sup>c</sup>Not conducted if the subject was menstruating at the visit

**Table S2** Inclusion/exclusion criteria

| Inclusion criteria                                                                                | Exclusion criteria                                                                   |
|---------------------------------------------------------------------------------------------------|--------------------------------------------------------------------------------------|
| ≥ 20 years of age                                                                                 | Blood disorders <sup>c</sup>                                                         |
| Diagnosis of uterine leiomyoma <sup>a</sup> , with ≥ 1 measurable noncalcified myoma <sup>b</sup> | Lower abdominal pain due to irritable bowel syndrome or severe interstitial cystitis |
| Regular menstrual cycle (25–38 days)                                                              | Thyroid dysfunction                                                                  |
| Heavy menstrual bleeding in one menstrual cycle, total PBAC score ≥ 120                           | Pelvic inflammatory disease                                                          |
|                                                                                                   | Positive Pap smear test result                                                       |
|                                                                                                   | History of hysterectomy or bilateral oophorectomy <sup>d</sup>                       |

*Abbreviation:* PBAC pictorial blood loss assessment chart

<sup>a</sup>Confirmed by transvaginal ultrasound scan, magnetic resonance imaging, computed tomography scan, or laparoscopy

<sup>b</sup>Widest diameter ≥ 3 cm

<sup>c</sup>Other than iron-deficiency anemia

<sup>d</sup>Or history of other medical conditions that could interfere with participation in the study

**Table S3** Results of the subgroup analysis of total PBAC score

| Baseline PBAC score subgroup | Treatment       | <i>n</i> | Proportion of patients with total PBAC score < 10 from weeks 6–12 (%) |
|------------------------------|-----------------|----------|-----------------------------------------------------------------------|
| 120 ≤ PBAC < 200             | Placebo         | 20       | 0                                                                     |
|                              | Relugolix 10 mg | 23       | 30.4                                                                  |
|                              | Relugolix 20 mg | 25       | 48.0                                                                  |
|                              | Relugolix 40 mg | 26       | 80.8                                                                  |
| 200 ≤ PBAC < 500             | Placebo         | 27       | 0                                                                     |
|                              | Relugolix 10 mg | 20       | 15.0                                                                  |
|                              | Relugolix 20 mg | 21       | 38.1                                                                  |
|                              | Relugolix 40 mg | 26       | 84.6                                                                  |
| 500 ≤ PBAC < maximum         | Placebo         | 10       | 0                                                                     |
|                              | Relugolix 10 mg | 5        | 0                                                                     |
|                              | Relugolix 20 mg | 8        | 37.5                                                                  |
|                              | Relugolix 40 mg | 2        | 100                                                                   |

*Abbreviation:* PBAC pictorial blood loss assessment chart

**Supplementary Fig. S1** Secondary efficacy endpoints: **A.** Proportion of patients with a total pictorial blood loss assessment chart (PBAC) score of <10 for weeks 2-6. **B.** Proportion of patients with a PBAC score < 10 for weeks 2-12. **C.** Proportion of patients with a total PBAC score of 0 for weeks 2-6. **D.** Proportion of patients with a total PBAC score of 0 for weeks 2-12.

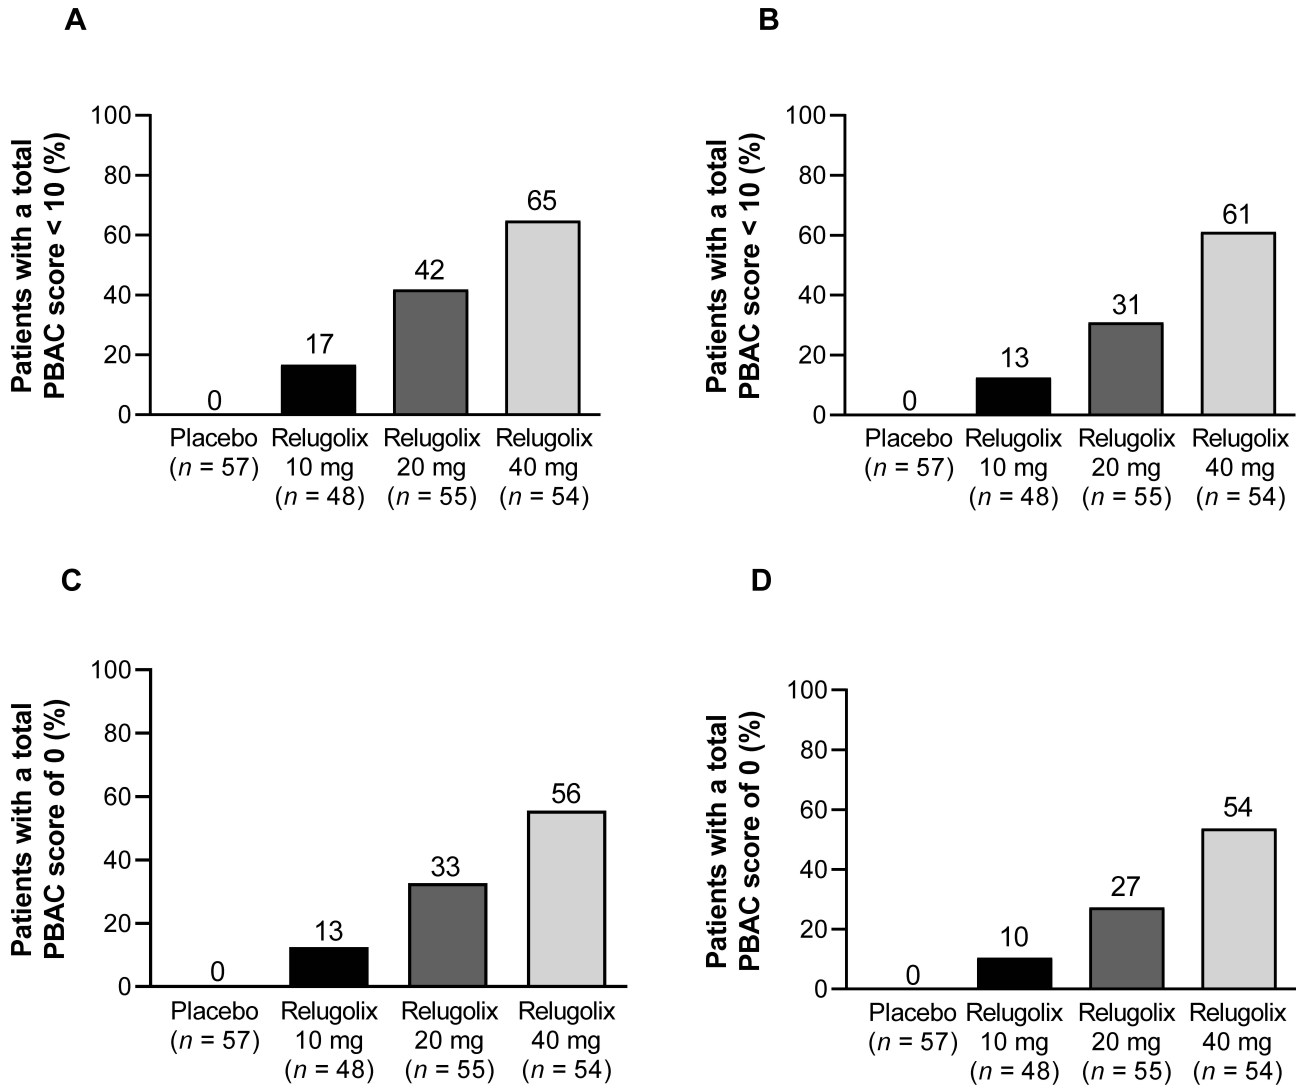

**Supplementary Fig. S2.** Secondary efficacy endpoints: **A.** Mean percent change from baseline in myoma volume.

**B.** Mean percent change from baseline in uterine volume.

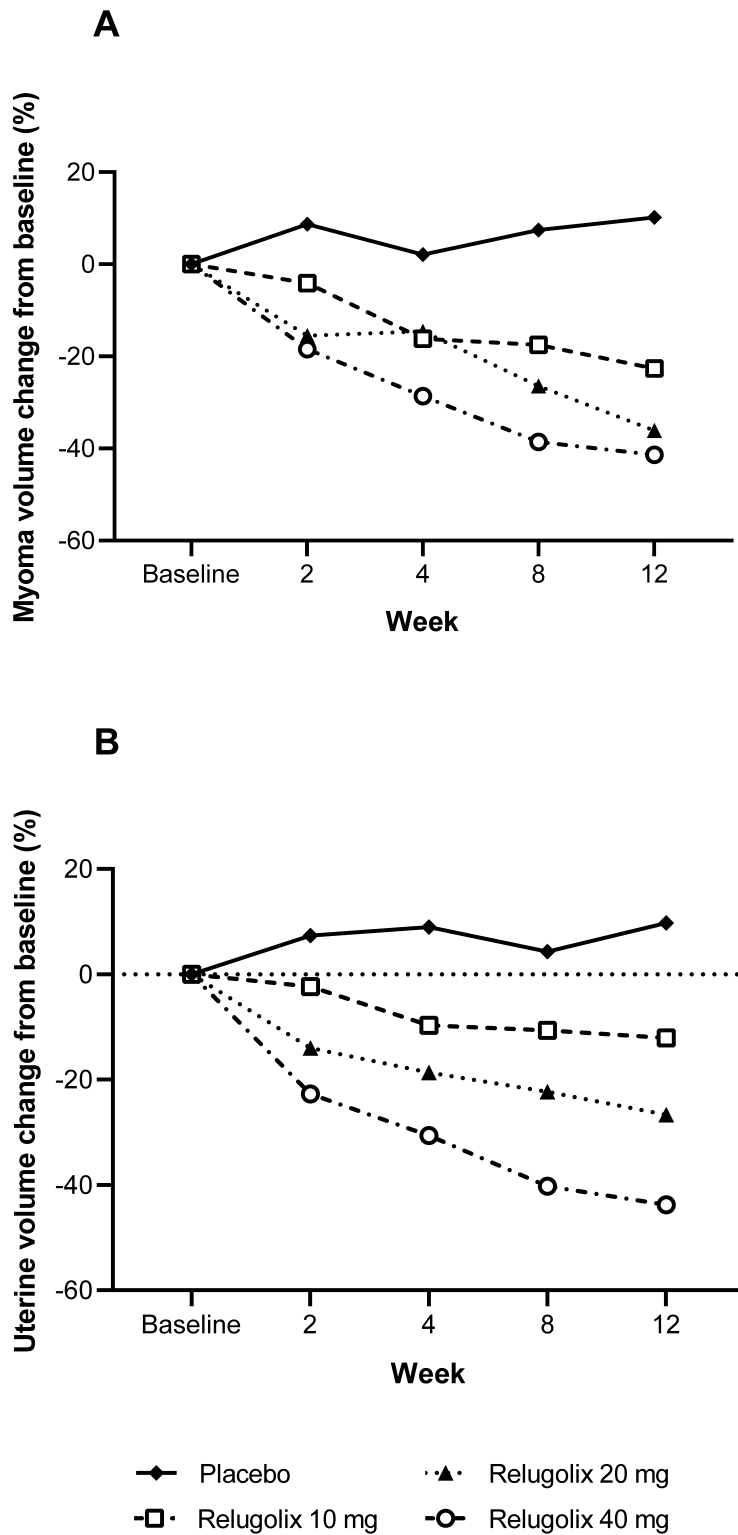

**Supplementary Fig. S3.** Secondary efficacy endpoint: Change from baseline in serum level of hemoglobin.

**A.** Overall. **B.** Without oral iron. **C.** With oral iron.

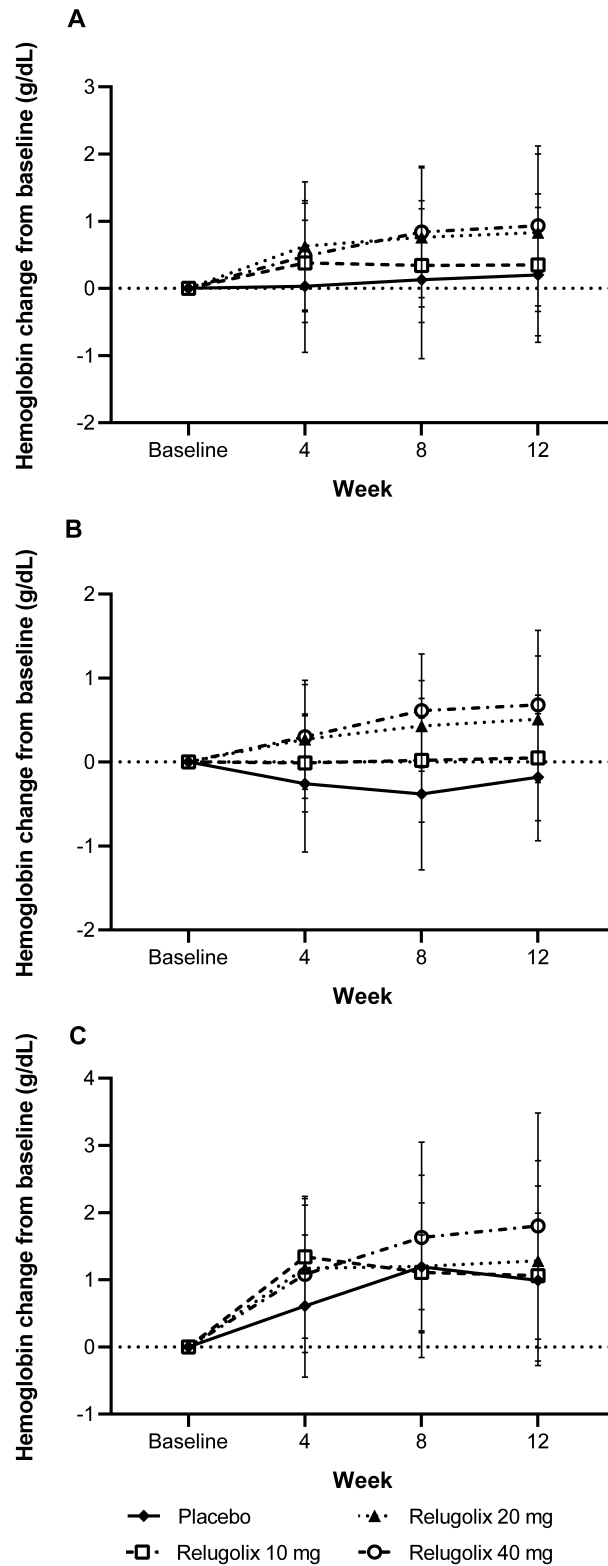

**Supplementary Fig. S4.** Secondary efficacy endpoint: Mean change from baseline in UFS-QOL score. **A.** Symptom severity score, **B.** HRQL total score. HRQL, health-related quality of life.

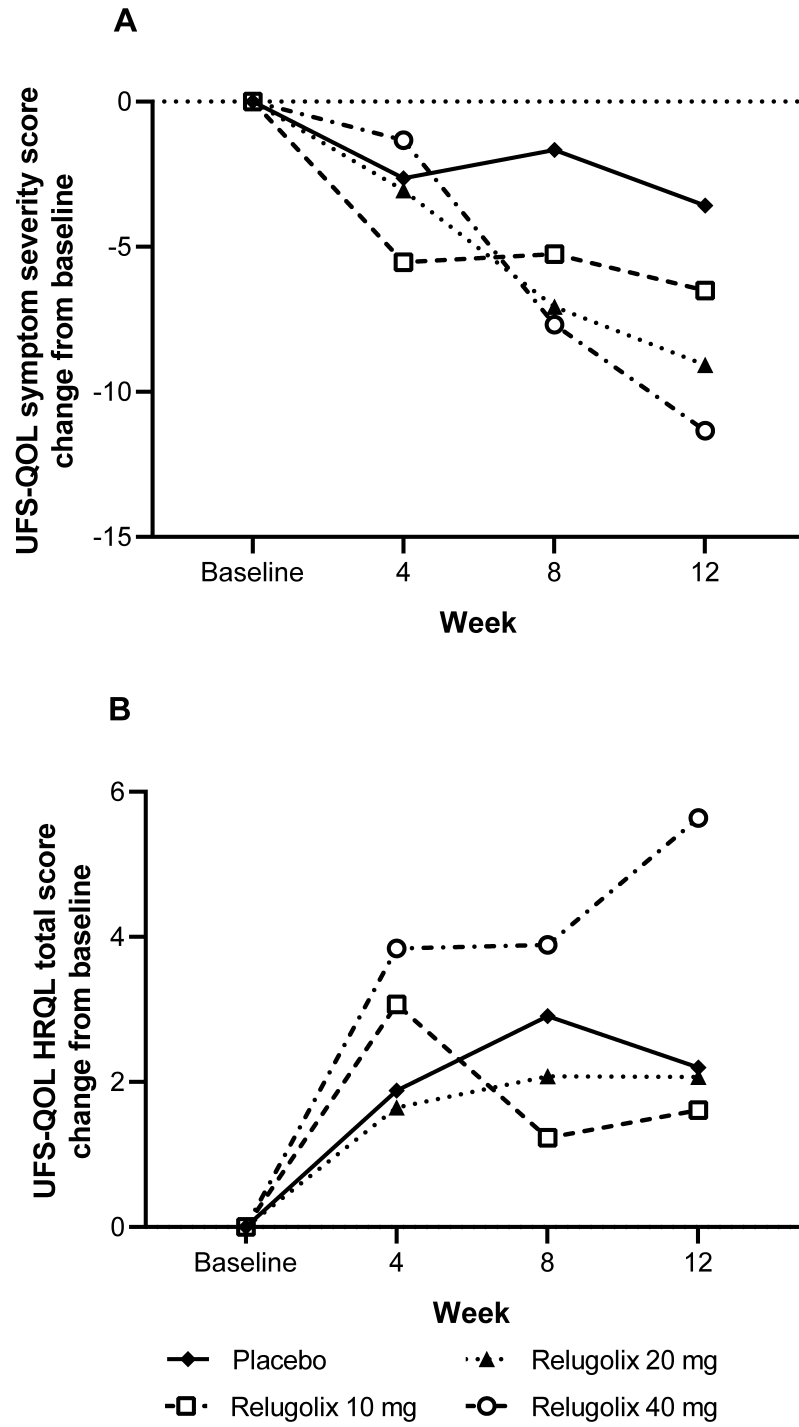

**Supplementary Fig. S5.** Change in serum levels of (A) LH, (B) FSH, and (C) progesterone across the study.

Data are the medians. LH, luteinizing hormone; FSH, follicle-stimulating hormone; FFU, the final day of follow-up.

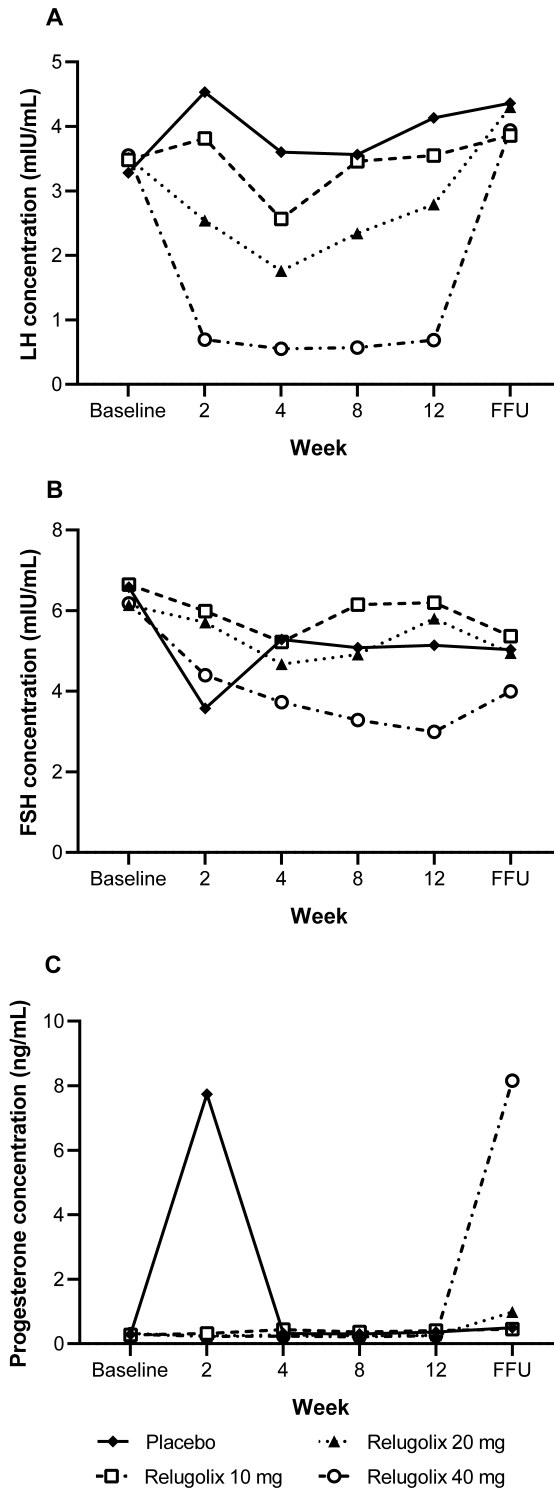

Supplement: 12905_2021_1475_MOESM1_ESM.pdf [file 12905_2021_1475_MOESM1_ESM.pdf]
